# Supplementary material for: Enhanced peroxidase-like activity of bimetal (Fe/Co) MIL-101 for determination of tetracycline and hydrogen peroxide
Source: Royal Society of Chemistry journal article supplement (doi:10.1039/d2nj04403j), 2022-01-01
Supplement: d2nj04403j1.pdf [file d2nj04403j1.pdf]

## Supporting Information

### Enhanced Peroxidase-like Activity of Bimetal (Fe/Co) MIL-101 for Determination of Tetracycline and Hydrogen Peroxide

Baocan Zhu<sup>a</sup>, Shanmin Dong<sup>b</sup>, Zhenchao Liu<sup>a</sup>, Yan Gao<sup>a,\*</sup>, Xixi Zhu<sup>a</sup>, Min Xie<sup>c,\*</sup>  
and Qingyun Liu<sup>a,\*</sup>

#### Synthetic procedure

Different molar ratios (1:0, 0.95:0.05, 0.9:0.1, 0.8:0.2, 0.7:0.3) of  $\text{FeCl}_3 \cdot 6\text{H}_2\text{O}$  and  $\text{CoCl}_2 \cdot 6\text{H}_2\text{O}$  with a total amount of 1 mmol were dissolved in DMF (20 mL), 1 mmol of terephthalic acid was added and sonicated for 15 min. After that, the above solution was solvothermally heated in an oven at 150 °C for 3 h. Then, the as-prepared MIL-101(Fe/Co) nanocomposites were naturally cooled to ambient temperature, washed with DMF and ethanol in turn several times. Finally, the products dried at 60 °C for 12 h.

#### Detection of tetracycline in real serums

The detection process of the actual water sample is the same as the previous tetracycline detection process. The actual sample were added into the mixture of 200  $\mu\text{L}$  of 0.3 mg/mL MIL-101(Fe/Co) and 1200  $\mu\text{L}$  NaAc-HAc buffer (pH = 4.0). After incubation for another 1 min, 200  $\mu\text{L}$   $\text{H}_2\text{O}_2$  solution and 200  $\mu\text{L}$  TMB were added in turn. The total volume of mixed solution was controlled as 2.0 mL. After reacted for 3 min, the absorbance of mixed solution was monitored.

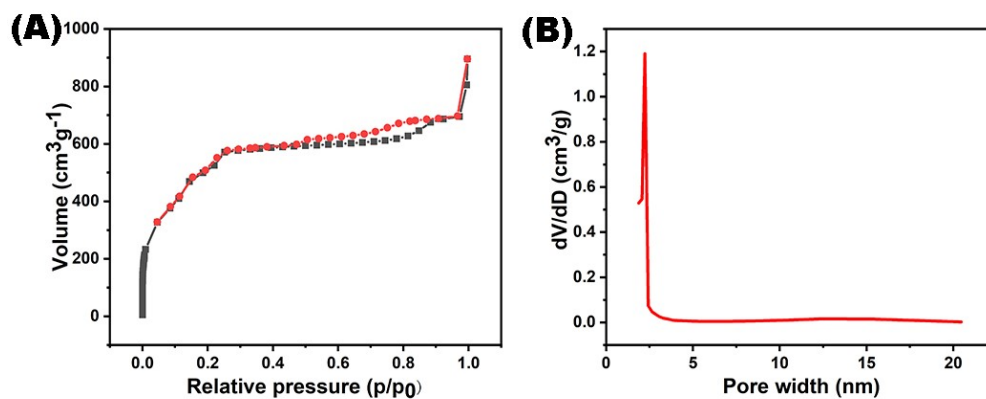

**Figure S1** N<sub>2</sub> adsorption–desorption isotherms (A) and pore size distribution curves (B) of MIL-101 (Fe/Co), respectively.

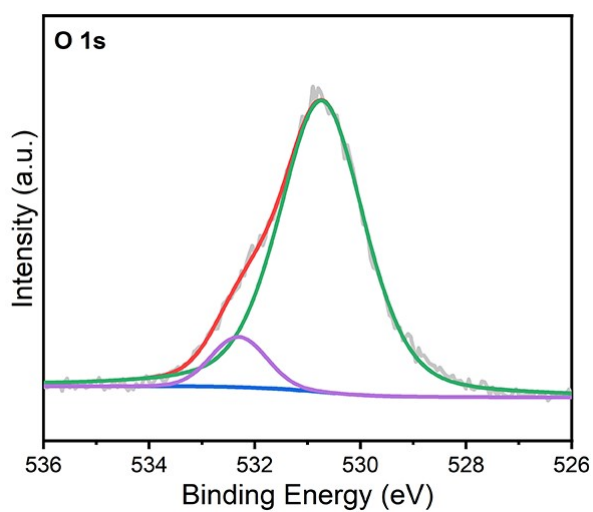

**Figure S2** XPS spectrum of O1s of MIL-101(Fe/Co).

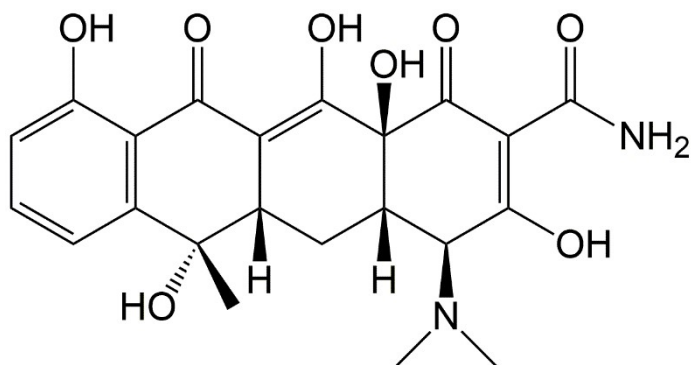

**Figure S3** The molecular structure of tetracycline (TC).

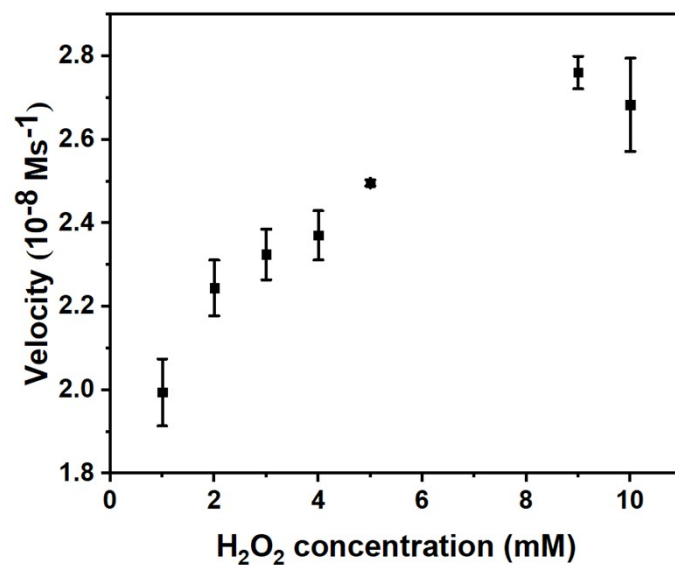

**Fig. S4** The reaction rate varied with hydrogen peroxide concentration (1-10 mM).

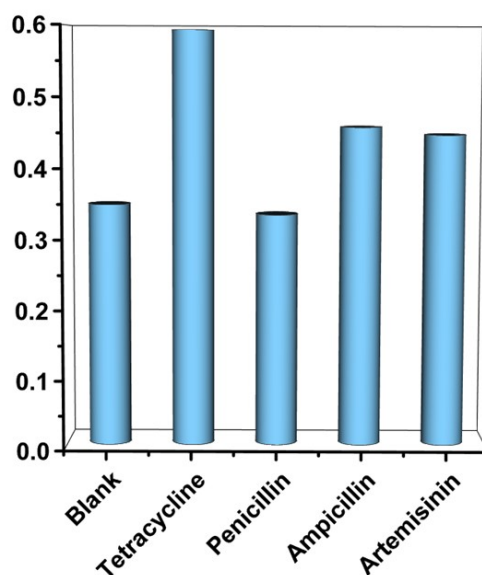

**Fig. S5** Selectivity of the MIL-101(Fe/Co)-based colorimetric method for tetracycline detection (8  $\mu\text{M}$ ) toward interferences (40  $\mu\text{M}$ ). Blank: MIL-101(Fe/Co)+H<sub>2</sub>O<sub>2</sub>+TMB.

**Table S1** Experimental results of TC determination.

| Sample (Tap water) | Added ( $\mu\text{M}$ ) | Found ( $\mu\text{M}$ ) | Recovery (%) | RSD (% , n=3) |
|--------------------|-------------------------|-------------------------|--------------|---------------|
| 1                  | 3                       | 3.10                    | 103.33       | 0.40          |
| 2                  | 6                       | 6.22                    | 103.67       | 0.88          |
